# Supplementary material for: The investigation of the electrochemically supercapacitive performances of mesoporous CuCo2S4
Source: Royal Society of Chemistry journal article supplement (doi:10.1039/c6ra20120b), 2016-01-01
Supplement: c6ra20120b1.pdf [file c6ra20120b1.pdf]

## **Electronic Supplementary Information (ESI)**

### **The investigation of the electrochemically supercapacitive performances of mesoporous $\text{CuCo}_2\text{S}_4$**

**Yirong Zhu<sup>a,b</sup>, Xiaobo Ji<sup>c</sup>, Han Chen<sup>a</sup>, Liujiang Xi<sup>a</sup>, Wenqiang Gong<sup>a</sup> and Yong  
Liu<sup>\*b</sup>**

<sup>a</sup>College of Metallurgy and Materials Engineering, Hunan University of Technology,  
Zhuzhou, 412007, China. E-mail: zhuyirong2004@163.com

<sup>b</sup>State Key Lab of Powder Metallurgy, Central South University, Changsha, 410083,  
China. E-mail: yonliu@csu.edu.cn

<sup>c</sup>College of Chemistry and Chemical Engineering, Central South University,  
Changsha, 410083, China. E-mail: xji@csu.edu.cn

**Table. S1** Comparison of the electrochemical performances of the as-prepared mesoporous CuCo<sub>2</sub>S<sub>4</sub> nanoparticles with previously reported ternary and binary metal sulfides/oxides nanostructures.

| Sample                                                    | Specific capacitance                              | Rate capacity retention                      | Cycling capacity retention                     | Electrolyte | Reference |
|-----------------------------------------------------------|---------------------------------------------------|----------------------------------------------|------------------------------------------------|-------------|-----------|
| CuCo <sub>2</sub> O <sub>4</sub> nanostructures           | 338 F g <sup>-1</sup> at 1 A g <sup>-1</sup>      | 26% (from 1 to 50 A g <sup>-1</sup> )        | 96% (1000 cycles at 2 A g <sup>-1</sup> )      | 3 M KOH     | [S1]      |
| CuCo <sub>2</sub> S <sub>4</sub> nanoparticles            | 5030 F g <sup>-1</sup> at 20 A g <sup>-1</sup>    | 27.1% (from 20 to 70 A g <sup>-1</sup> )     | 79.5% (2000 cycles at 70 A g <sup>-1</sup> )   | polysulfide | [S2]      |
| Zn <sub>0.76</sub> Co <sub>0.24</sub> S nanostructures    | 486.2 F g <sup>-1</sup> at 2 A g <sup>-1</sup>    | 65.4% (from 2 to 20 A g <sup>-1</sup> )      | 86.4% (2000 cycles at 5 A g <sup>-1</sup> )    | 1 M KOH     | [S3]      |
| Nanoparticle-like CuS                                     | 371 F g <sup>-1</sup> at 1 A g <sup>-1</sup>      | /                                            | /                                              | 2 M KOH     | [S4]      |
| NiS <sub>2</sub> nanostructures                           | 695 F g <sup>-1</sup> at 1.25 A g <sup>-1</sup>   | 22.7% (from 1.25 to 12.5 A g <sup>-1</sup> ) | 93.4% (3000 cycles at 1.25 A g <sup>-1</sup> ) | 3 M KOH     | [S5]      |
| Porous ZnCo <sub>2</sub> O <sub>4</sub> nanoparticles     | 457 F g <sup>-1</sup> at 1 A g <sup>-1</sup>      | 80.5% (from 1 to 20 A g <sup>-1</sup> )      | 97.9% (1500 cycles at 2 A g <sup>-1</sup> )    | 6 M KOH     | [S6]      |
| CoNi <sub>2</sub> S <sub>4</sub> nanoparticles            | 1169 F g <sup>-1</sup> at 1 A g <sup>-1</sup>     | 60.1% (from 1 to 5 A g <sup>-1</sup> )       | 49% (2000 cycles at 4 A g <sup>-1</sup> )      | 3 M KOH     | [S7]      |
| CoS <sub>2</sub> nanodendrite                             | 323.05 F g <sup>-1</sup> at 0.5 A g <sup>-1</sup> | 65.3% (from 0.5 to 8 A g <sup>-1</sup> )     | 80.22% (3000 cycles at 4 A g <sup>-1</sup> )   | 2 M KOH     | [S8]      |
| Mesoporous MnCo <sub>2</sub> O <sub>4</sub> nanostructure | 346 F g <sup>-1</sup> at 1 A g <sup>-1</sup>      | /                                            | 88% (2000 cycles at 5 A g <sup>-1</sup> )      | 6 M KOH     | [S9]      |
| Nanostructured NiCo <sub>2</sub> O <sub>4</sub>           | 671 F g <sup>-1</sup> at 1 A g <sup>-1</sup>      | 53.2% (from 1 to 20 A g <sup>-1</sup> )      | 98% (7000 cycles at 1 A g <sup>-1</sup> )      | 1 M KOH     | [S10]     |
| Mesoporous CuCo <sub>2</sub> S <sub>4</sub> nanoparticles | 752 F g <sup>-1</sup> at 2 A g <sup>-1</sup>      | 47.9% (from 2 to 100 A g <sup>-1</sup> )     | 98.1% (5000 cycles at 3 A g <sup>-1</sup> )    | 2 M KOH     | This work |

## References:

- [S1] A. Pendashteh, M. S. Rahmanifar, R. B. Kaner and M. F. Mousavi, *Chem. Commun.*, 2014, **50**, 1972-1975.
- [S2] J. Tang, Y. Ge, J. Shen and M. Ye, *Chem. Commun.*, 2016, **52**, 1509-1512.
- [S3] J. Yang, Y. Zhang, C. Sun, G. Guo, W. Sun, W. Huang, Q. Yan and X. Dong, *J. Mater. Chem. A.*, 2015, **3**, 11462-11470.
- [S4] H. Peng, G. Ma, J. Mu, K. Sun and Z. Lei, *Materials Letters*, 2014, **122**, 25-28.
- [S5] H. Pang, C. Wei, X. Li, G. Li, Y. Ma, S. Li, J. Chen and J. Zhang, *Scientific Reports*, 2014, **4**, 3577.
- [S6] S. Chen, M. Xue, Y. Li, Y. Pan, L. Zhu, D. Zhang, Q. Fang and S. Qiu, *Inorg. Chem. Front.*, 2015, **2**, 177-183.
- [S7] W. Du, Z. Zhu, Y. Wang, J. Liu, W. Yang, X. Qian and H. Pang, *RSC Adv.*, 2014, **4**, 6998-7002.
- [S8] D. Zhang, H. Liu, J. Zhang, X. Wang, R. Zhang, J. Zhou, J. Zhong and B. Yuan, *Int. J. Electrochem. Sci.*, 2016, **11**, 6791-6798.
- [S9] N. Padmanathan and S. Selladurai, *Ionics*, 2014, **20**, 479-487.
- [S10] C. Wang, X. Zhang, D. Zhang, C. Yao and Y. Ma, *Electrochim. Acta*, 2012, **63**, 220-227.
